# Supplementary material for: Cirrhotic Human Liver Extracellular Matrix 3D Scaffolds Promote Smad-Dependent TGF-β1 Epithelial Mesenchymal Transition
Source: MDPI journal article supplement (doi:10.3390/cells9010083), 2019-12-28
Supplement: s1 [file s1]

Figure S1

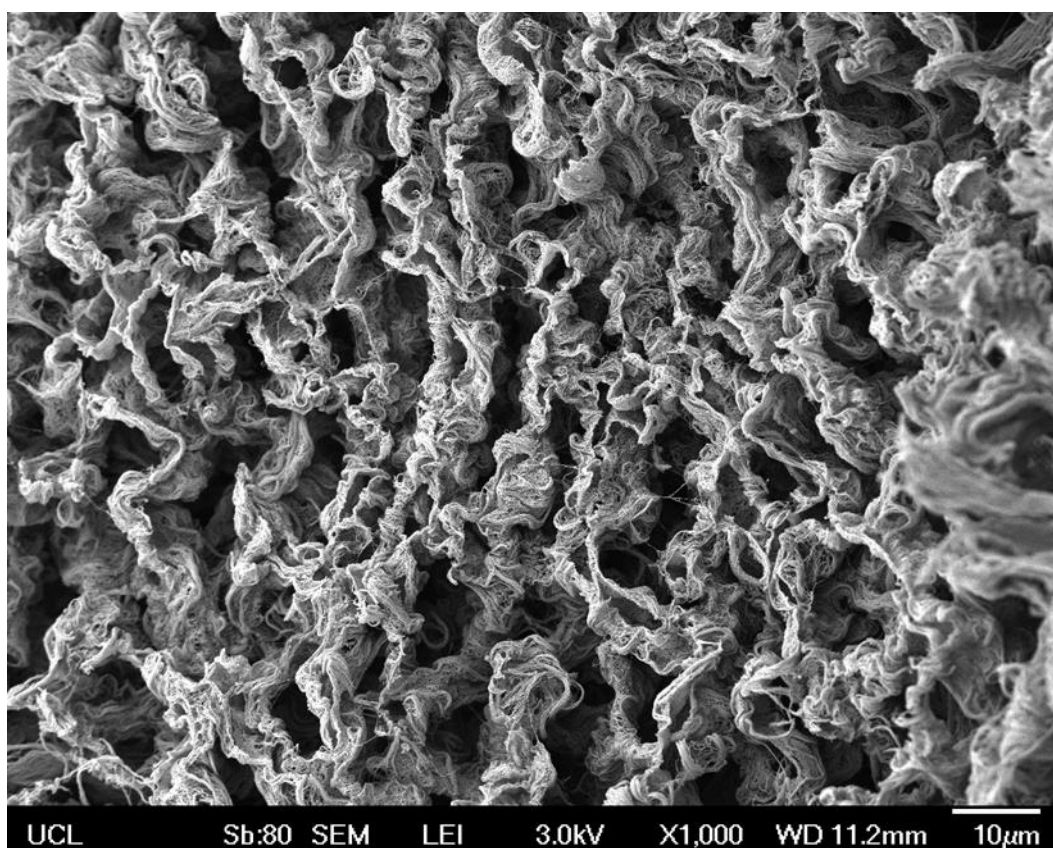

Figure S1. Microscopic characterization of decellularization of human healthy liver 3D scaffolds. Scanning Electron Microscopy of a decellularized 3D healthy scaffold showing the preservation of the thin collagen fibrils and hepatocyte pockets (octothorpe). Scale bars 10  $\mu$ m.
