# Supplementary material for: Cirrhotic Human Liver Extracellular Matrix 3D Scaffolds Promote Smad-Dependent TGF-β1 Epithelial Mesenchymal Transition
Source: MDPI journal article supplement (doi:10.3390/cells9010083), 2019-12-28
Supplement: s1 [file s1]

**Table S2.**

Antibodies used when performing immunohistochemistry and western blot analysis.

| <b>Antibody</b>           | <b>Species</b> | <b>Dilution</b>      | <b>Company</b>                | <b>Catalogue N°</b> |
|---------------------------|----------------|----------------------|-------------------------------|---------------------|
| collagen I                | Rabbit         | 1:200                | Abcam                         | ab34710             |
| collagen III              | Rabbit         | 1:500                | Abcam                         | ab7778              |
| collagen IV               | mouse          | 1:25                 | Dako                          | M0785               |
| Laminin- $\alpha$ 5-chain | mouse          | 1:200                | Millipore                     | MAB1924             |
| fibronectin               | mouse          | 1:100                | Millipore                     | MAB1937             |
| TGF $\beta$ 1             | Rabbit         | 1:300                | Abcam                         | ab92486             |
| EPCAM                     | Mouse          | 1:50                 | Leica Biosystems              | NCL-ESA             |
| Alfa fetoprotein          | Rabbit         | 1:200                | Dako                          | A0008               |
| Anti-mouse IgG-<br>HRP    | Goat           | 1:10000              | Santa Cruz<br>Biotechnology   | Sc-2055             |
| Anti-rabbit IgG-<br>HRP   | Goat           | 1:10000 or<br>1:5000 | Cell Signalling<br>Technology | #7074               |
