# Supplementary material for: Cirrhotic Human Liver Extracellular Matrix 3D Scaffolds Promote Smad-Dependent TGF-β1 Epithelial Mesenchymal Transition
Source: MDPI journal article supplement (doi:10.3390/cells9010083), 2019-12-28
Supplement: s1 [file s1]

**Table S1. Decellularization protocols followed for healthy and cirrhotic liver scaffolds.**

Fresh reagents are used for each repetition. The Reagent Mix (RM) is composed of: 3% SDC, 0.5% SDS, 4.3% NaCl, 0.3% Triton X-100, 0.0025% EDTA and Milli-Q® ultrapure water (MQ).

| Healthy scaffolds |                    |             | Cirrhrotic scaffolds |                    |             |
|-------------------|--------------------|-------------|----------------------|--------------------|-------------|
| Reagent           | Duration (minutes) | Repetitions | Reagent              | Duration (minutes) | Repetitions |
| MQ                | 2                  | 5           | MQ                   | 2                  | 20          |
| NaCl              | 2                  | 5           | RM                   | 2                  | 1           |
| MQ                | 2                  | 5           | RM                   | 4                  | 2           |
| NaCl              | 2                  | 5           | PBS                  | 1                  | 1           |
| MQ                | 2                  | 3           | NaCl                 | 2                  | 5           |
| RM                | 2                  | 1           | MQ                   | 2                  | 5           |
| RM                | 4                  | 1           | RM                   | 2                  | 1           |
| PBS               | 5                  | 3           | RM                   | 4                  | 2           |
|                   |                    |             | MQ                   | 2                  | 10          |
|                   |                    |             | RM                   | 2                  | 1           |
|                   |                    |             | RM                   | 4                  | 2           |
|                   |                    |             | MQ                   | 2                  | 5           |
|                   |                    |             | RM                   | 5                  | 2           |
|                   |                    |             | MQ                   | 2                  | 5           |
|                   |                    |             | RM                   | 5                  | 2           |
|                   |                    |             | MQ                   | 2                  | 5           |
|                   |                    |             | RM                   | 5                  | 2           |
|                   |                    |             | PBS                  | 5                  | 3           |
