# Supplementary material for: Cirrhotic Human Liver Extracellular Matrix 3D Scaffolds Promote Smad-Dependent TGF-β1 Epithelial Mesenchymal Transition
Source: Cells. 2019 Dec 28;9(1):83. doi: 10.3390/cells9010083 (PMC7017194; doi:10.3390/cells9010083)
Supplement: Supplementary file 1 [file cells-09-00083-s001.zip]

Archive with 4 entries (4 files):
- Giuseppe Mazza et al Suppl info materials and methods.pdf
- Supplementary Figure S1.pdf
- Giuseppe Mazza et al Table S1.pdf
- Giuseppe Mazza et al Table S2.pdf
